# Supplementary material
Source: PubMed Central journal article supplement (PMC4421010)
Supplement: EC.00021-15_zek999094417so1.pdf [file EC.00021-15_zek999094417so1.pdf]

## Supplementary Figures

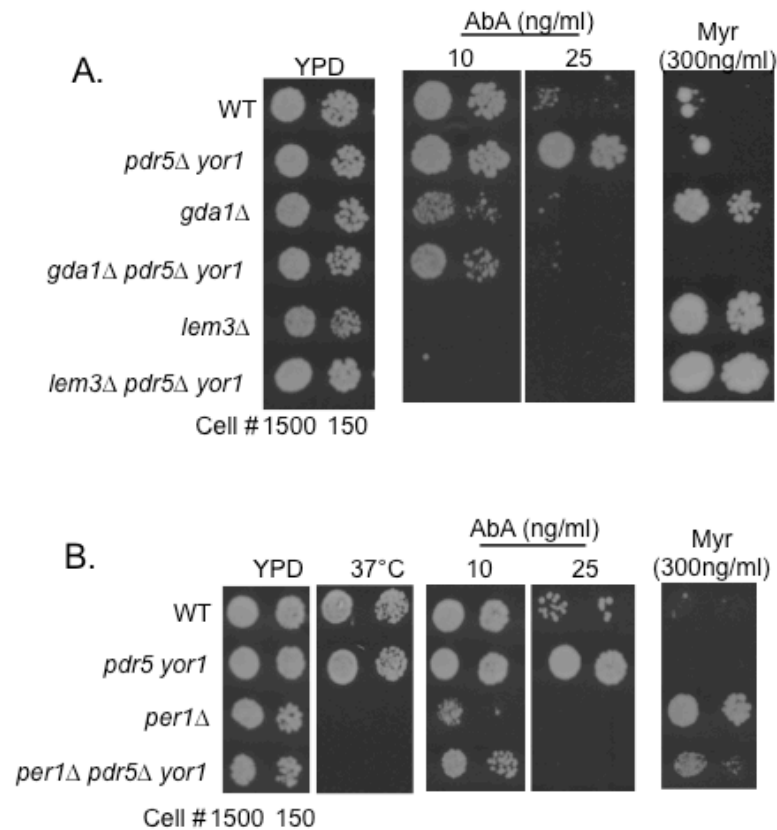

Figure S1. **EMS mutants correspond to loss-of-function alleles.** Disruption alleles of *GDA1*, *LEM3* and *PER1* were recovered from the yeast gene disruption collection that were marked with *kanMX4*. These mutations were individually transformed into isogenic wild-type and *pdr5Δ yor1* strains. Transformants were verified by PCR and tested for resistance to AbA or Myr as described in the text. A. Phenotype of null mutants of *GDA1* and *LEM3*. B. Phenotypes of null mutants of *PER1*. Note that the *PER1* disruption was also temperature sensitive as reported by Fujita et al (1).

## References

1. **Fujita M, Umemura M, Yoko-o T, Jigami Y.** 2006. *PER1* is required for GPI-phospholipase A2 activity and involved in lipid remodeling of GPI-anchored proteins. *Mol Biol Cell* **17**:5253-5264.
